# Supplementary material for: Evaluation of topotecan and 10-hydroxycamptothecin on Toxoplasma gondii: Implications on baseline DNA damage and repair efficiency
Source: PubMed Central journal article supplement — Int J Parasitol Drugs Drug Resist. 2023 Nov 24;23:120–9. doi: 10.1016/j.ijpddr.2023.11.004 (PMC10730954; doi:10.1016/j.ijpddr.2023.11.004), 2023-11-24

# Supplementary figure 1

## Topotecan

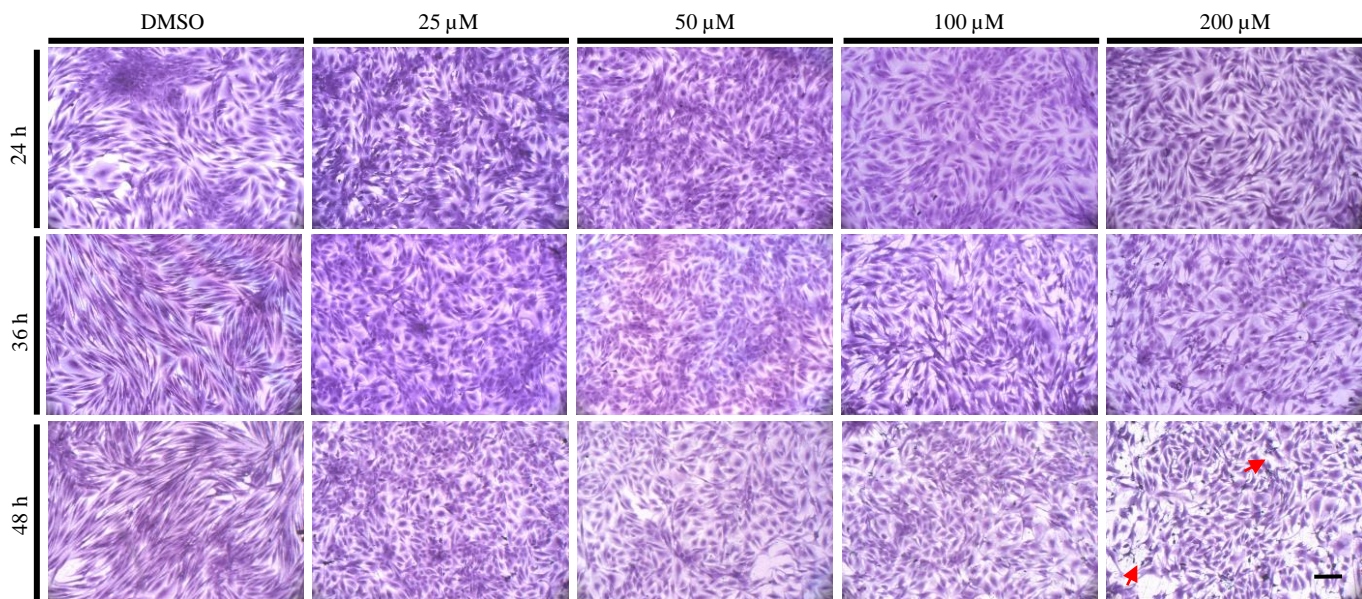

## HCPT

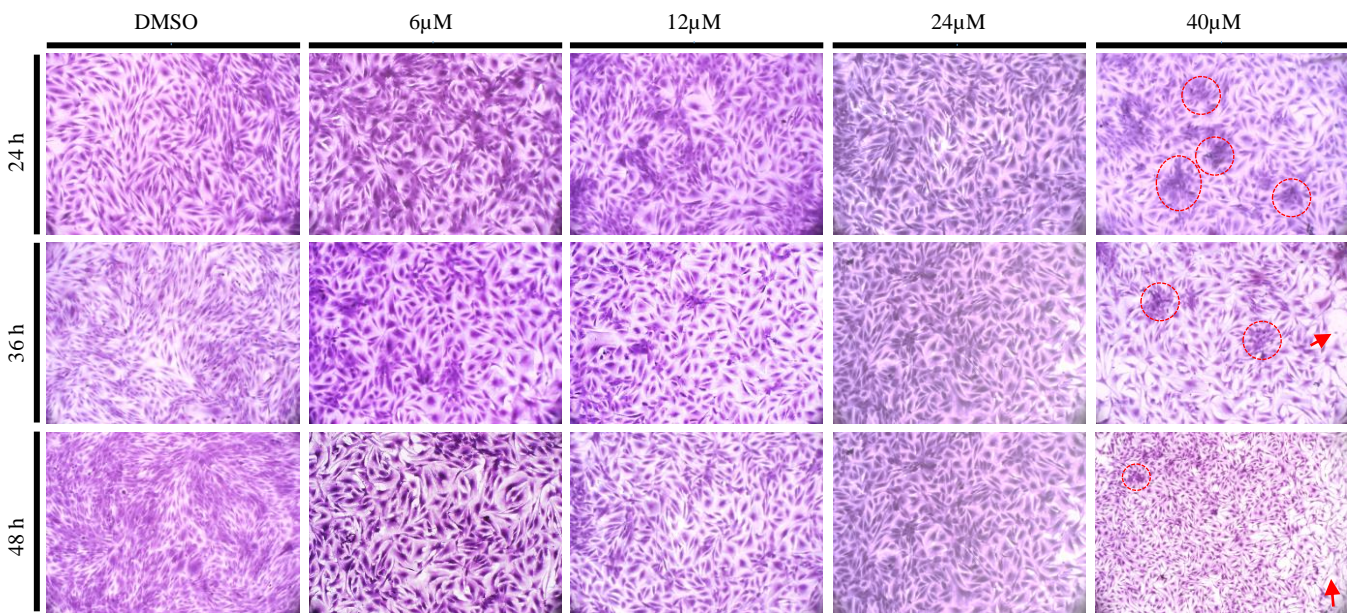

Supplementary figure 2

A

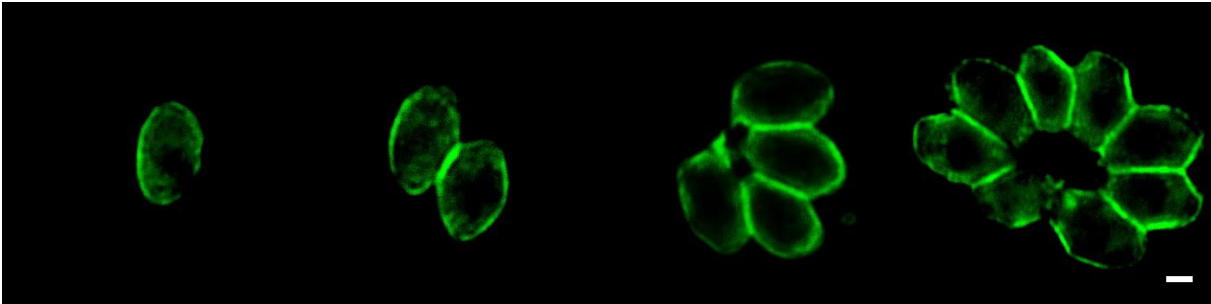

B

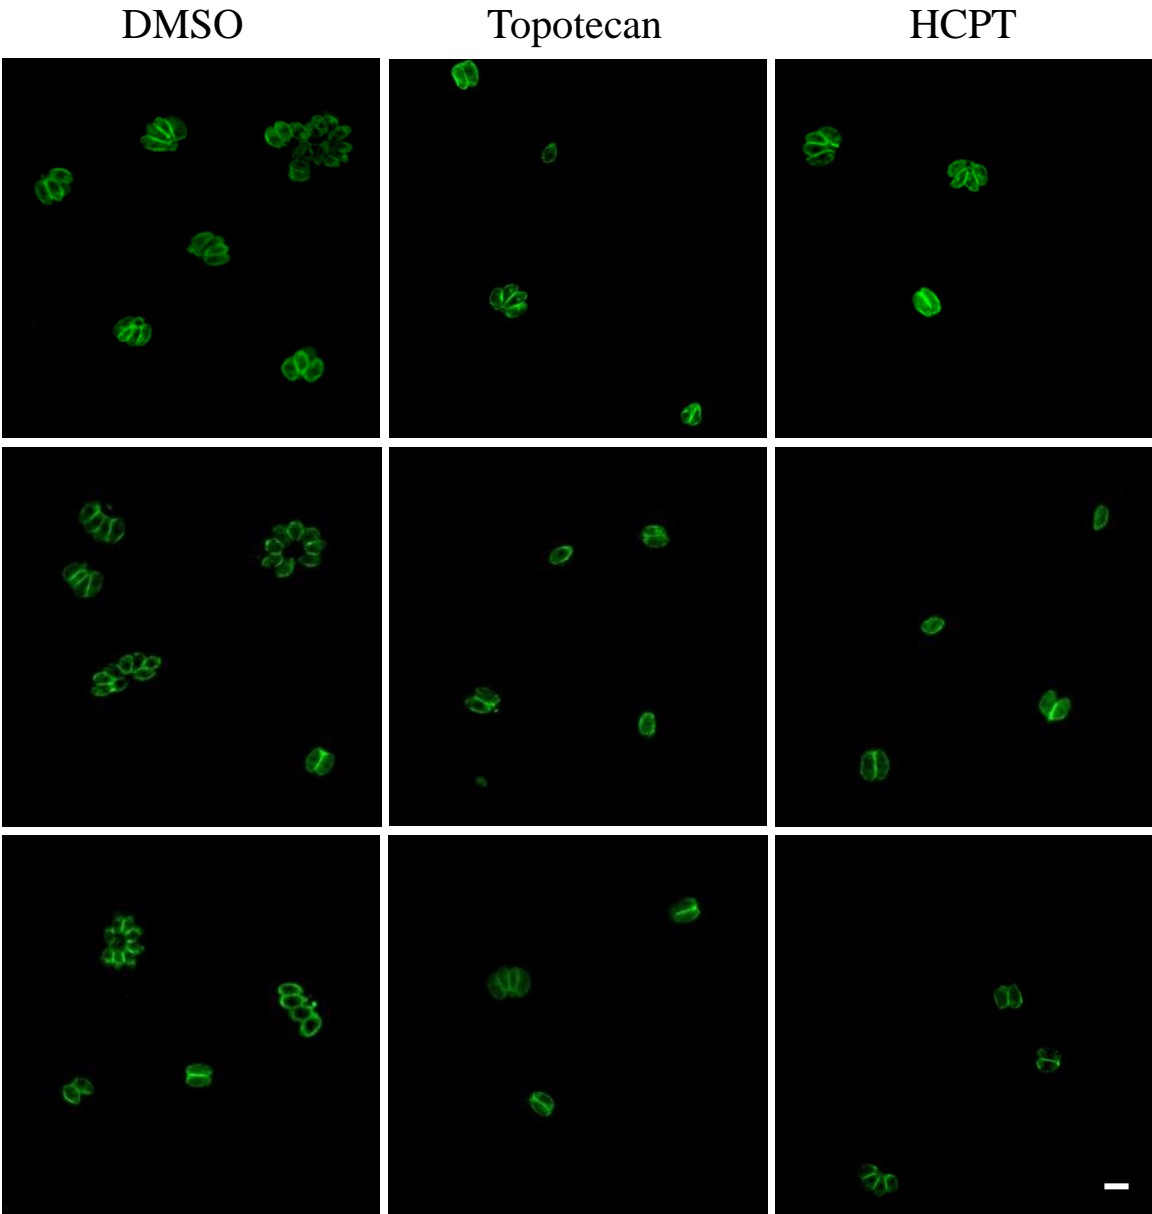

# Supplementary figure 3

## A

### Topotecan RHΔHXGPRT

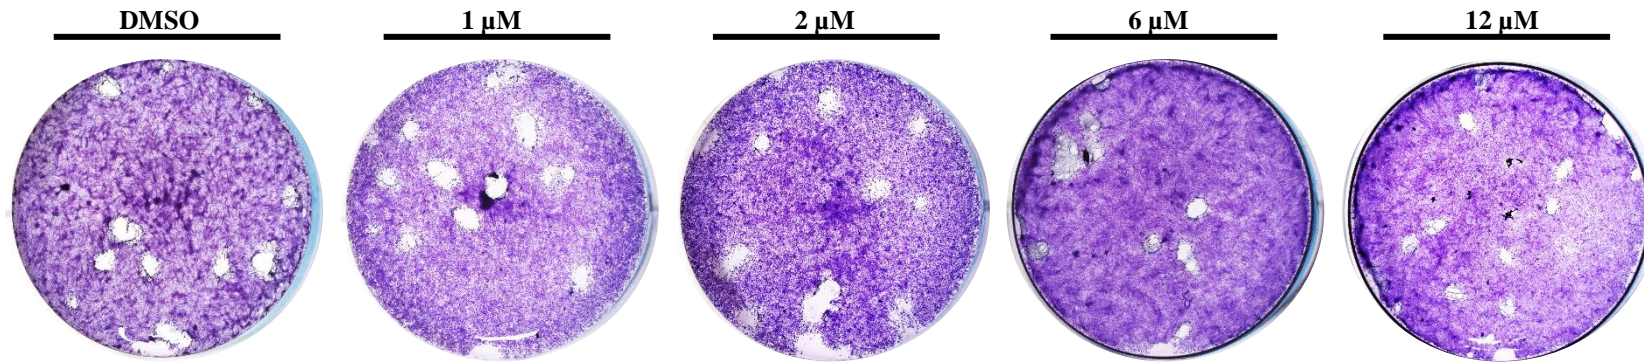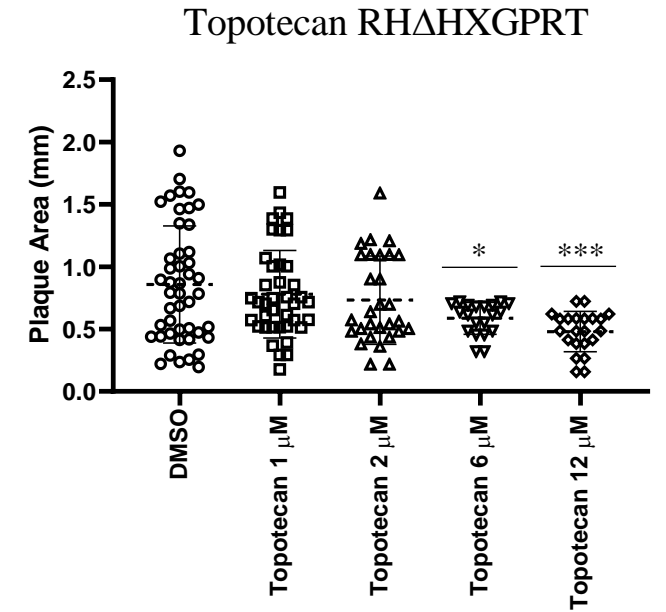

## B

### HCPT RHΔHXGPRT

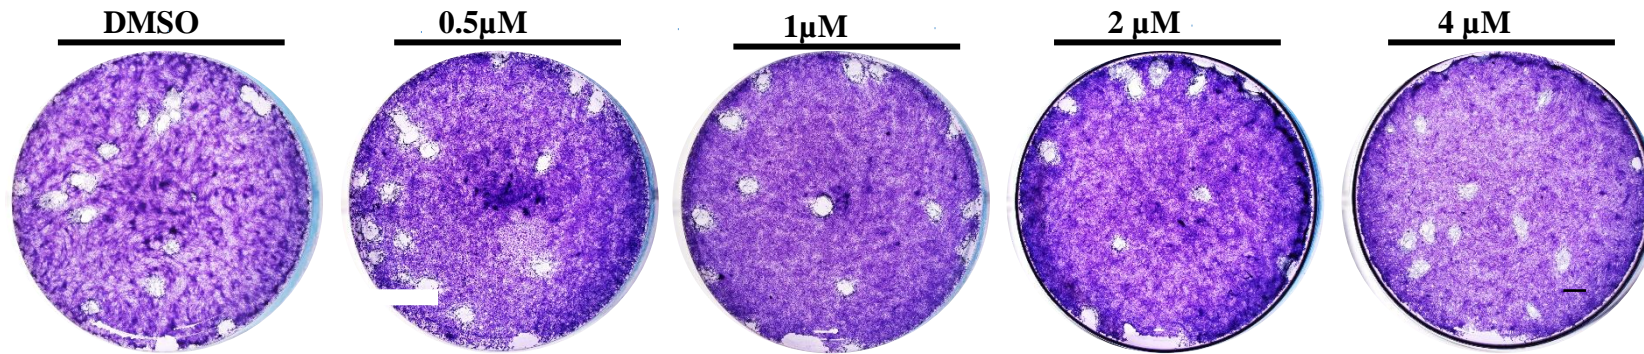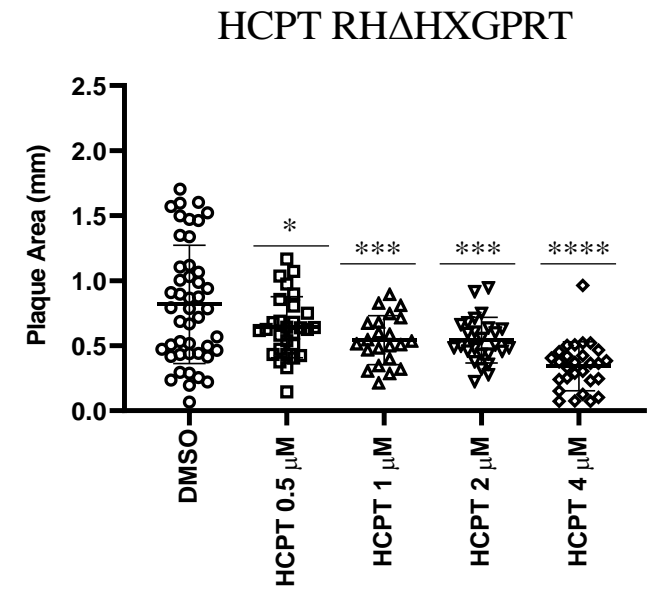

**C**Topotecan RH $\Delta$ KU80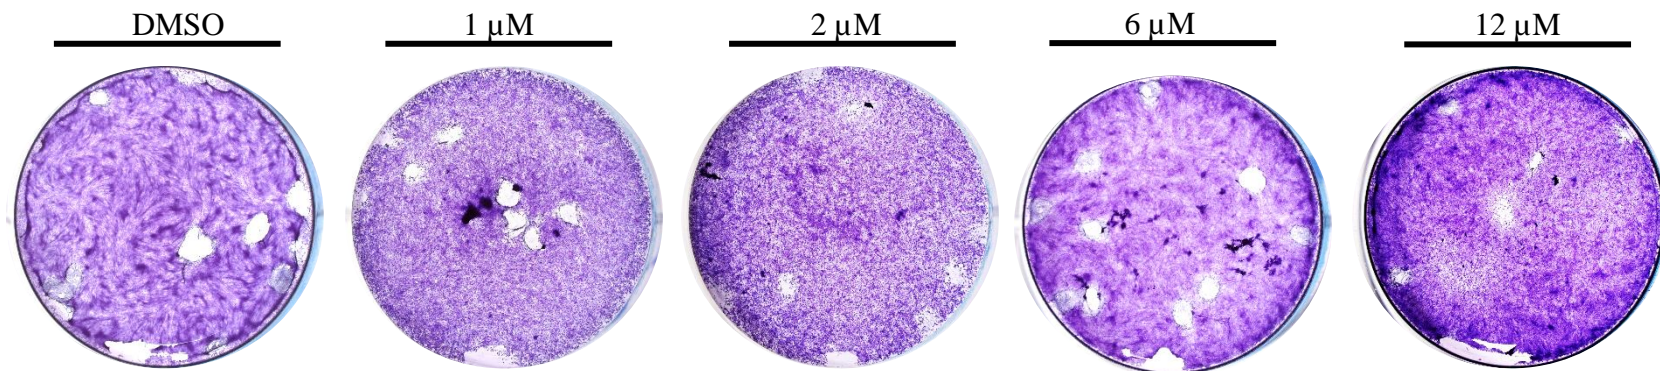Topotecan RH $\Delta$ KU80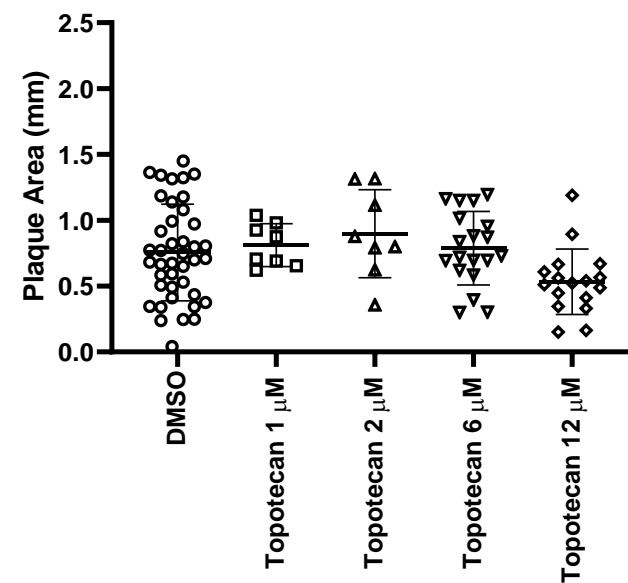**D**HCPT RH $\Delta$ KU80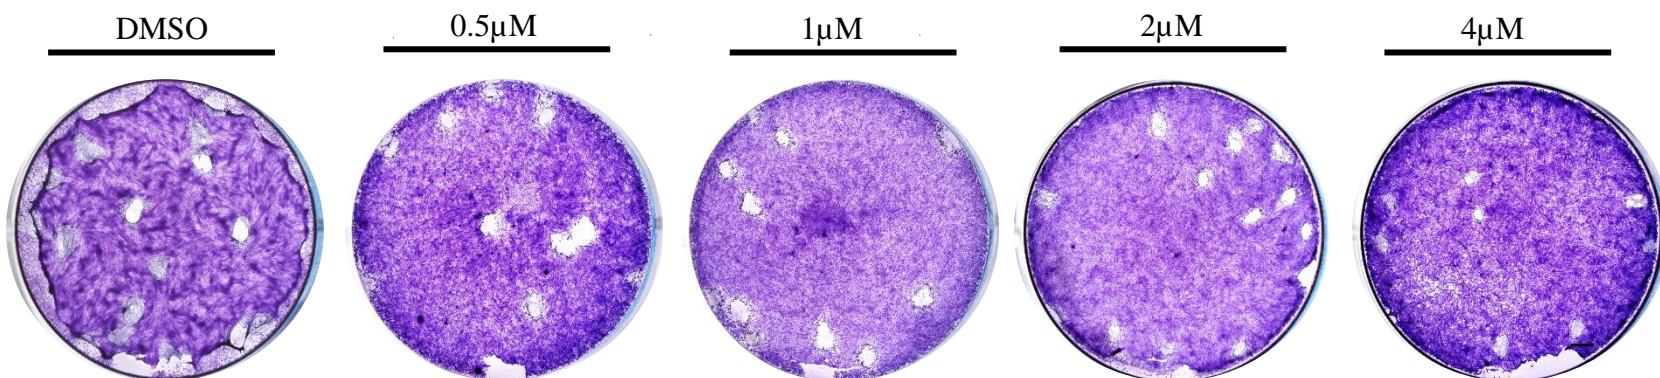HCPT RH $\Delta$ KU80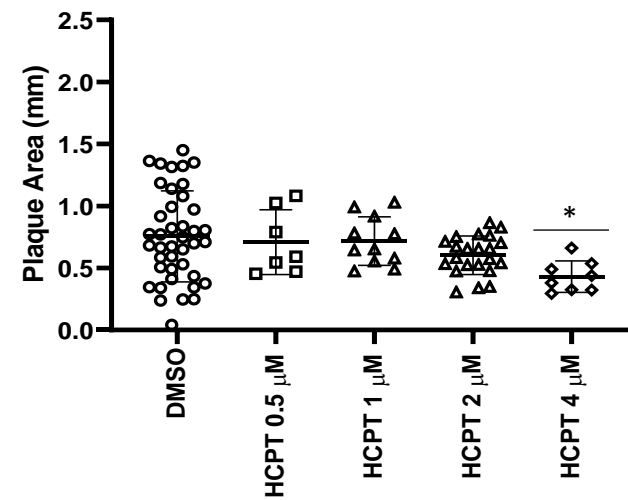

Supplementary figure 4

H2A.X

SAG1

MERGE

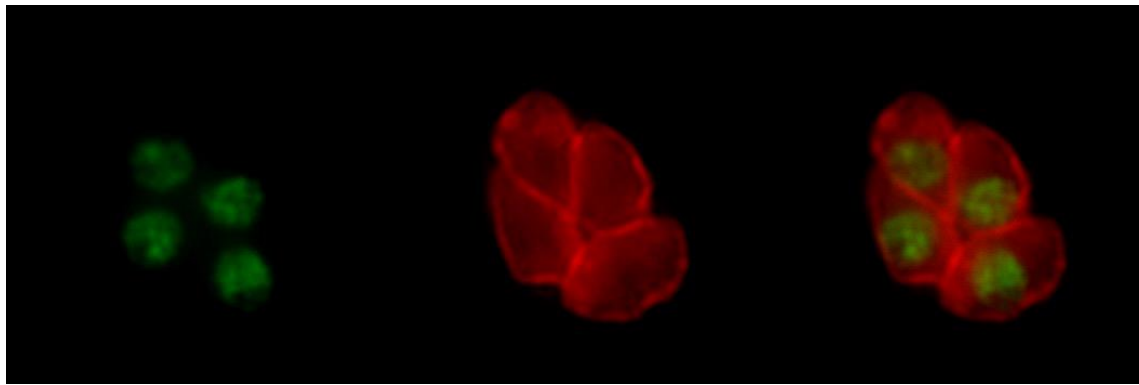

$\gamma$ H2A.X

SAG1

MERGE

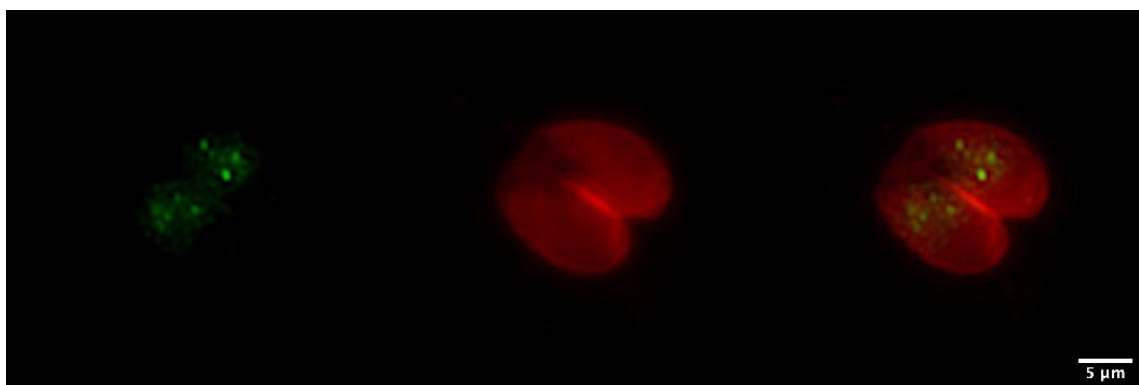

Supplement: mmc1.pdf [file mmc1.pdf]
